# Supplementary material for: A benzimidazole inhibitor attenuates sterile inflammation induced in a model of systemic autoinflammation in female mice
Source: PubMed Central journal article supplement (PMC7374700; doi:10.1038/s41598-020-68985-1), 2020-07-21
Supplement: 41598_2020_68985_MOESM1_ESM.pdf [file 41598_2020_68985_MOESM1_ESM.pdf]

# **A benzimidazole inhibitor attenuates sterile inflammation induced in a model of systemic autoinflammation in female mice**

Federica Agliano<sup>1</sup>, Keaton S. Karlinsey<sup>1</sup>, Michael Ragazzi<sup>1</sup>, Antoine Ménoret<sup>1, 2,\*</sup>,  
Anthony T. Vella<sup>1,\*</sup>

<sup>1</sup>Department of Immunology, University of Connecticut Health Center, Farmington, CT, USA.

<sup>2</sup>Institute for Systems Genomics, UConn Health, Farmington, CT, USA.

\*Corresponding author

## Supplementary Figure S1

**A**

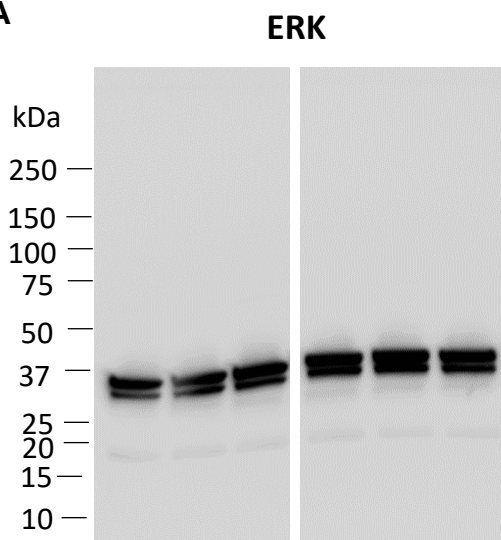

**$\beta$ -tubulin (upper band) and p-ERK (two lower bands)**

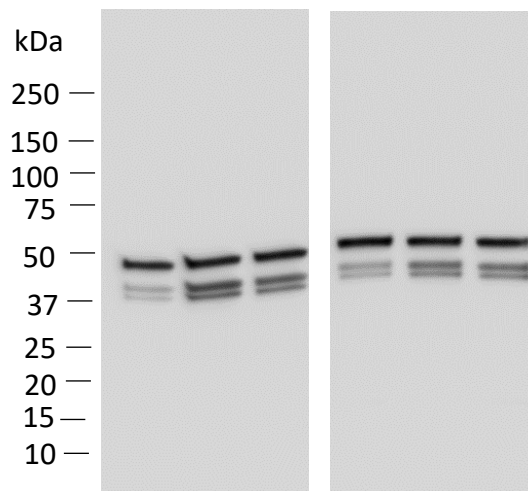

**B**

**Nucleus**

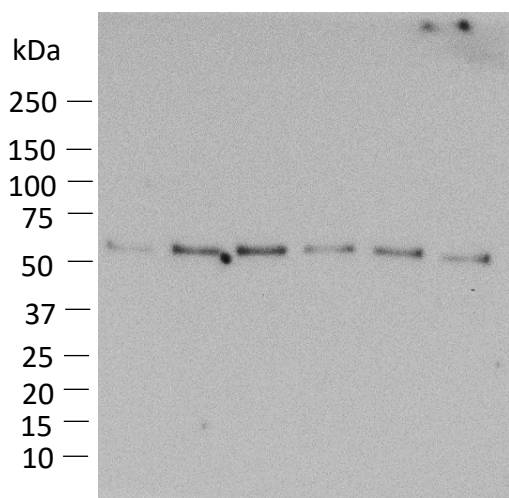

**Cytoplasm**

**p65**

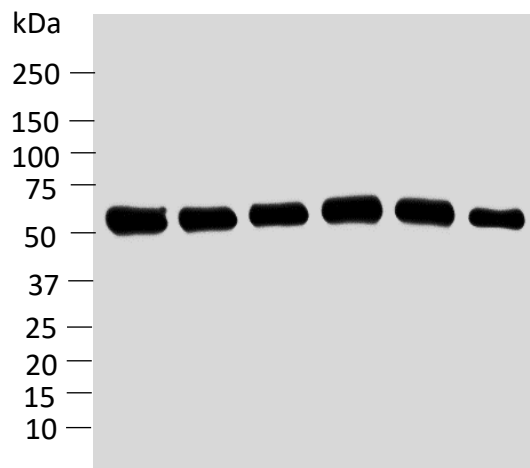

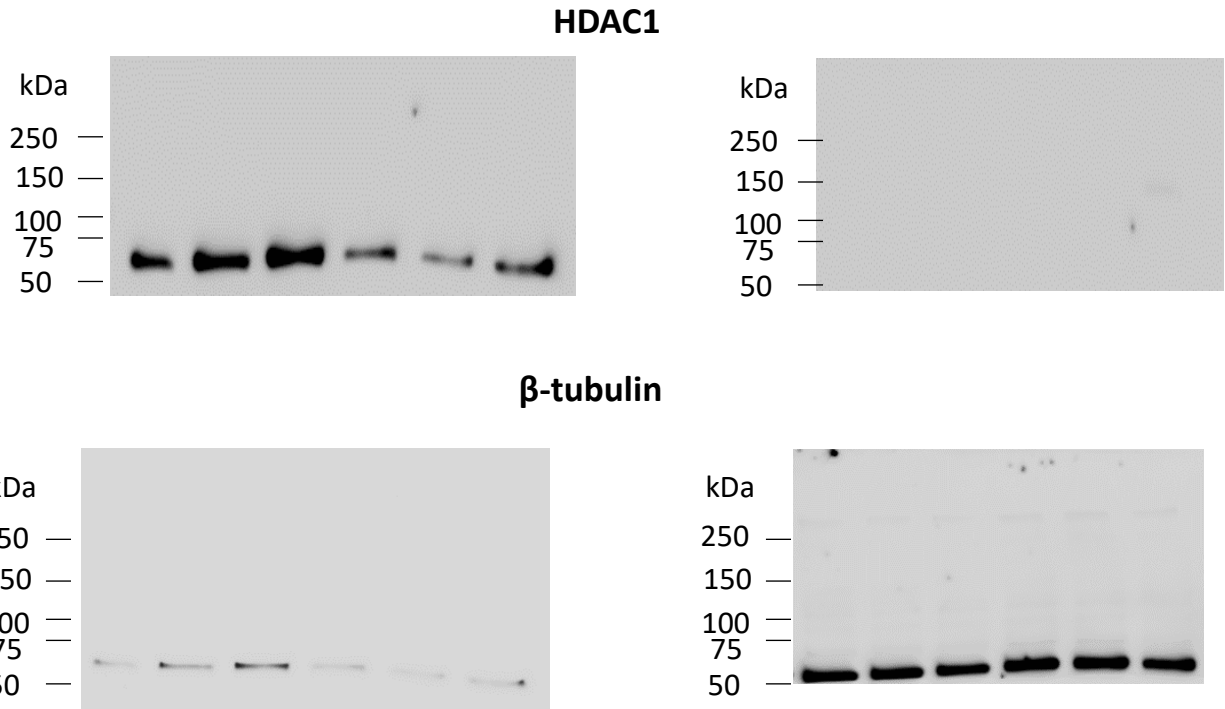

**Supplementary Figure S1. A.** Full-length membranes with bands showed in Fig. 2A. **B.** Full- or semi-length membranes with bands showed in Fig. 2C, E.

## Supplementary Figure S2

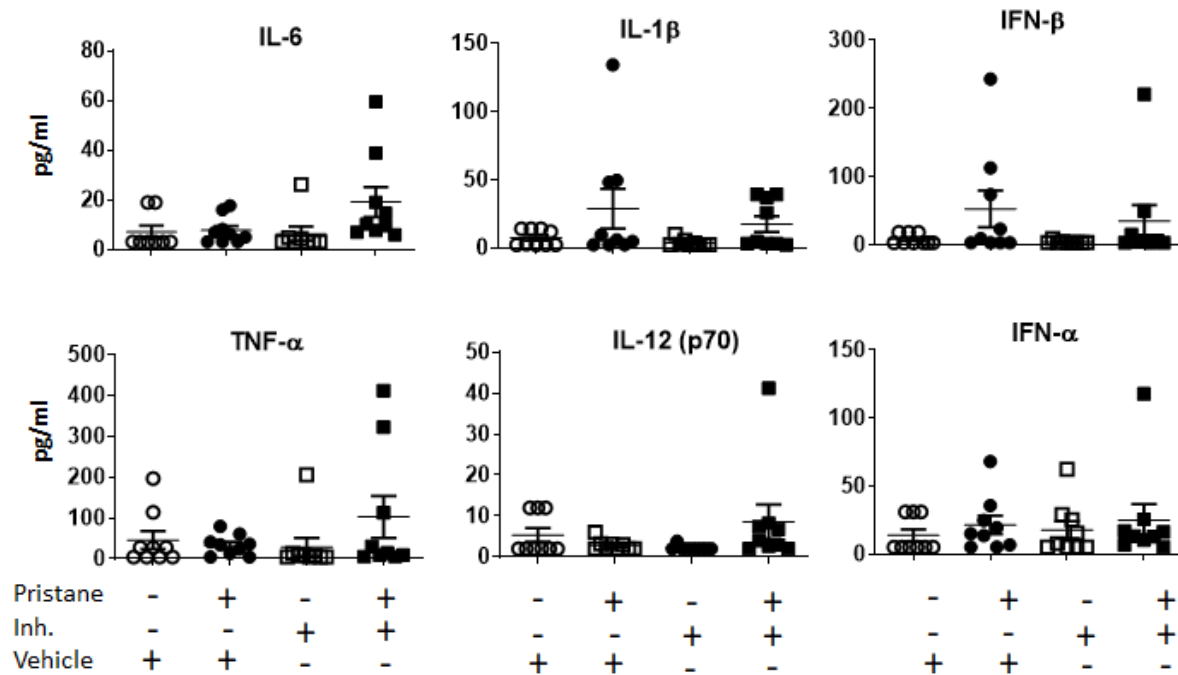

**Supplementary Figure S2. The benzimidazole inhibitor does not reduce pro-inflammatory cytokine production in sera of pristane-injected mice.** WT female mice received a pristane injection (0.5ml) and after one week were treated with the benzimidazole inhibitor twice per week for 8 weeks. Cytokine levels in sera were measured by a multiplex assay. A one-way ANOVA with Bonferroni post-test was performed to determine statistical significance. Combined data from 3 separate experiments (mean  $\pm$  SEM) are shown (n=9 mice per group). Each dot represents one mouse.
